# Supplementary material for: Detailed Phenotyping and Therapeutic Strategies for Intronic ABCA4 Variants in Stargardt Disease
Source: PubMed Central journal article supplement (PMC7352060; doi:10.1016/j.omtn.2020.06.007), 2020-06-12
Supplement: mmc1.pdf [file mmc1.pdf]

## Supplemental Information

### Detailed Phenotyping and Therapeutic Strategies for Intronic *ABCA4* Variants in Stargardt Disease

Mubeen Khan, Gavin Arno, Ana Fakin, David A. Parfitt, Patty P.A. Dhooge, Silvia Albert, Nathalie M. Bax, Lonneke Duijkers, Michael Niblock, Kwan L. Hau, Edward Bloch, Elena R. Schiff, Davide Piccolo, Michael C. Hogden, Carel B. Hoyng, Andrew R. Webster, Frans P.M. Cremers, Michael E. Cheetham, Alejandro Garanto, and Rob W.J. Collin

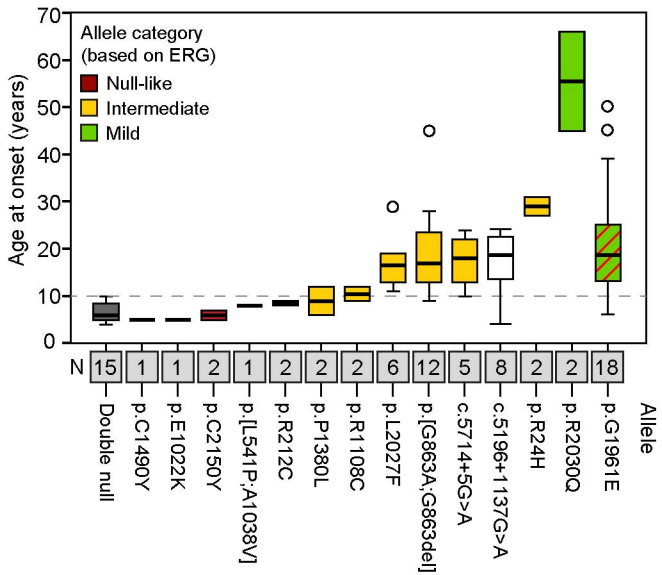

 c.5196+1137G>A  
+ null

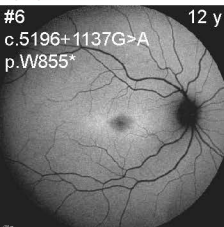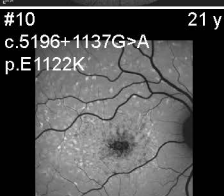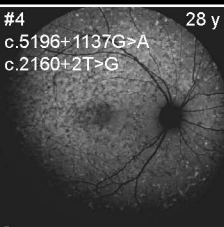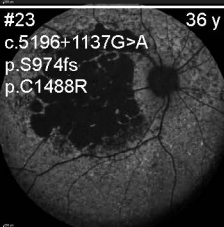

 Double null

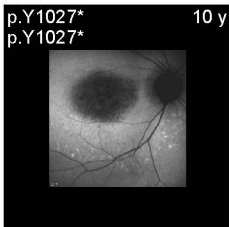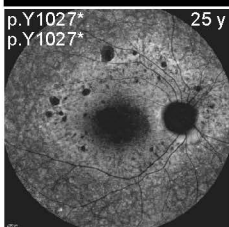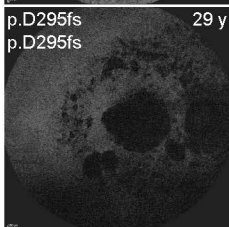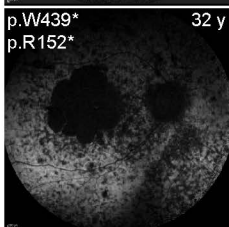

 c.5196+1137G>A  
+ null

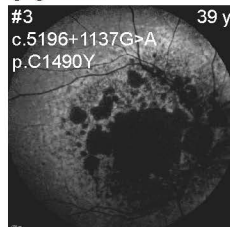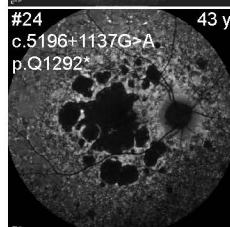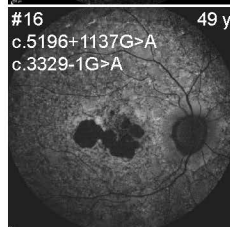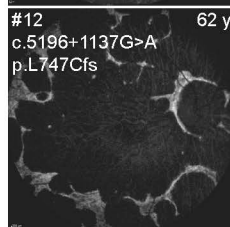

 Double null

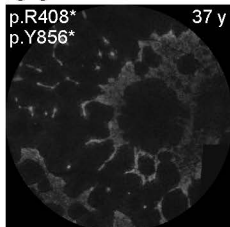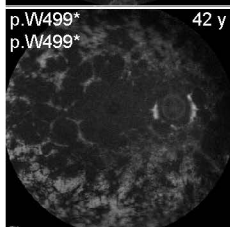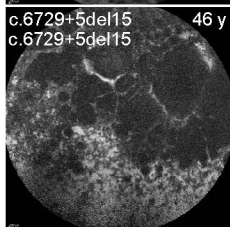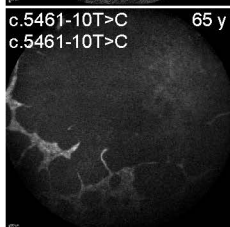

29 y

p.D295fs  
p.D295fs

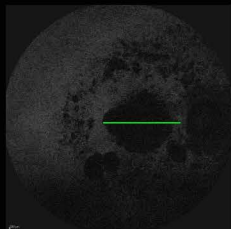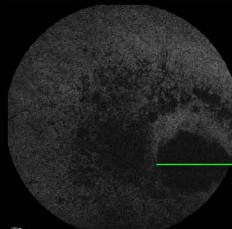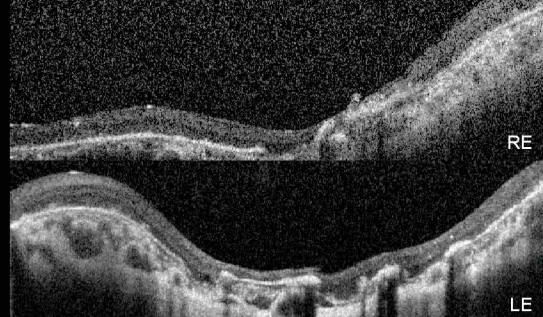

28 y

#4  
c.5196+1137G>A  
c.2160+2T>G

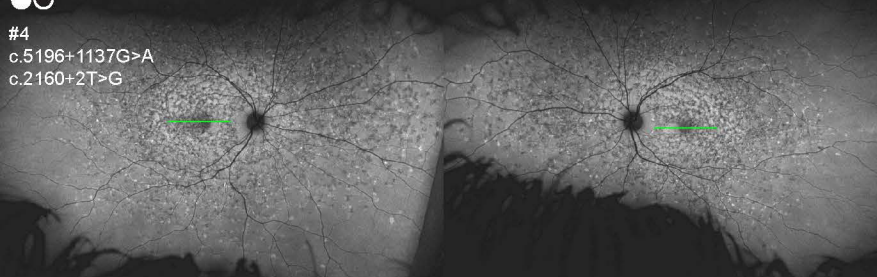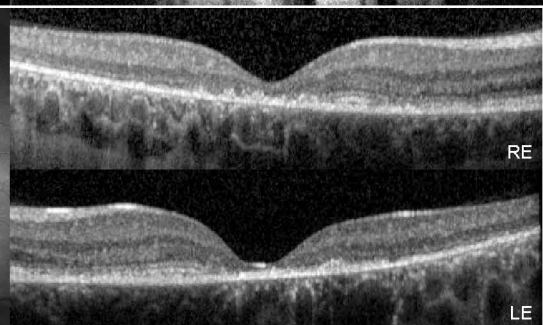

35y

#21  
c.5196+1137G>A  
c.5196+1137G>A

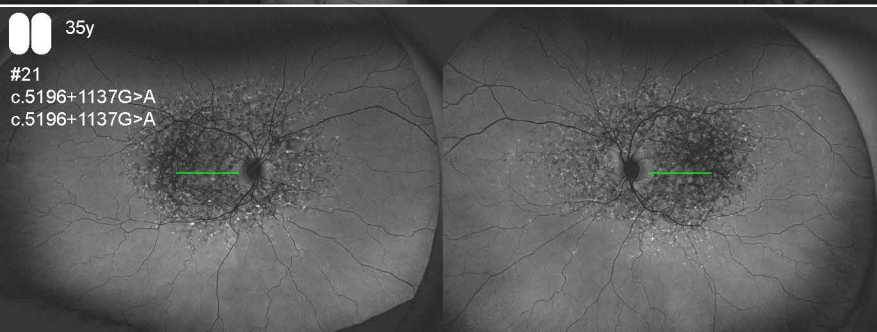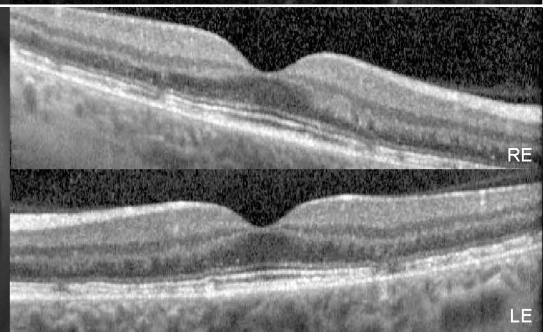

**ABCA4**  
ex36 - ex37

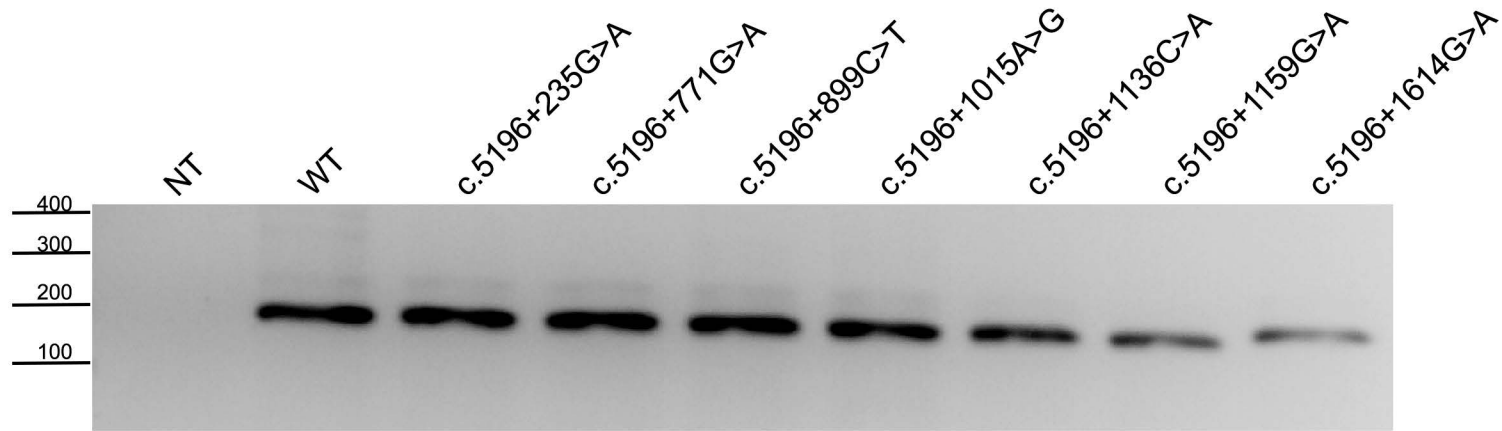

**RHO**  
ex 5

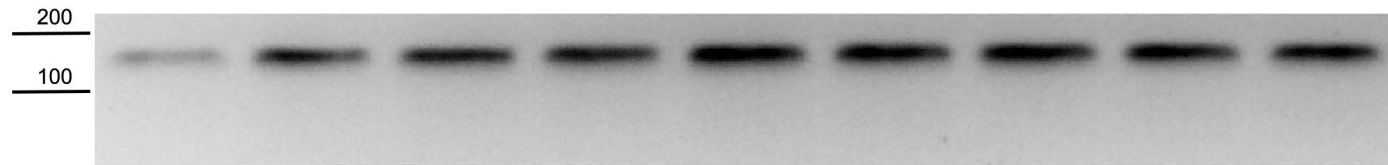

BA32\_WT\_correct  
exon 35 | exon 36

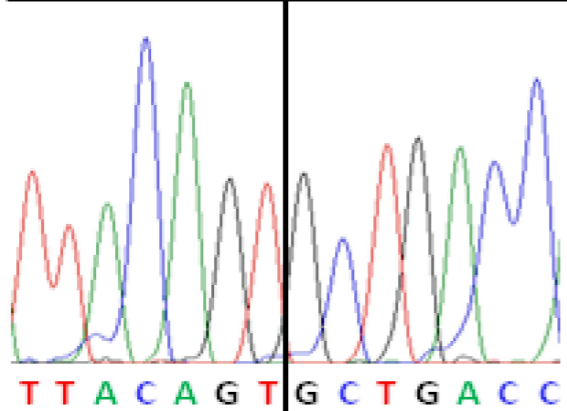

BA32\_WT\_correct  
exon 36 | exon 37

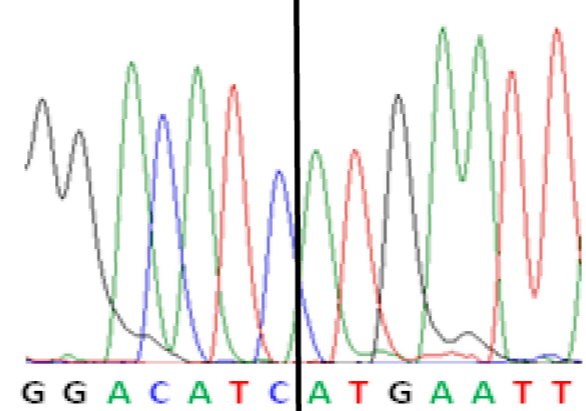

BA32\_WT\_correct  
exon 37 | exon 38

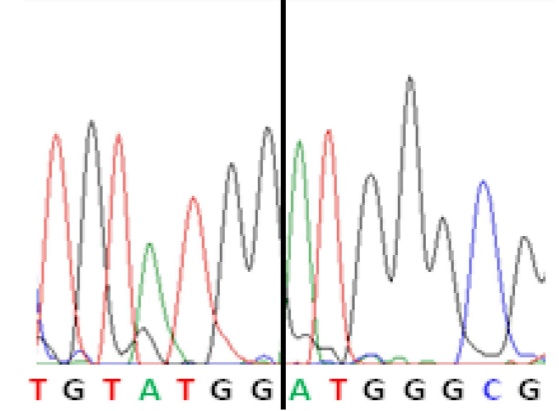

BA32\_c.5196+1013A>G

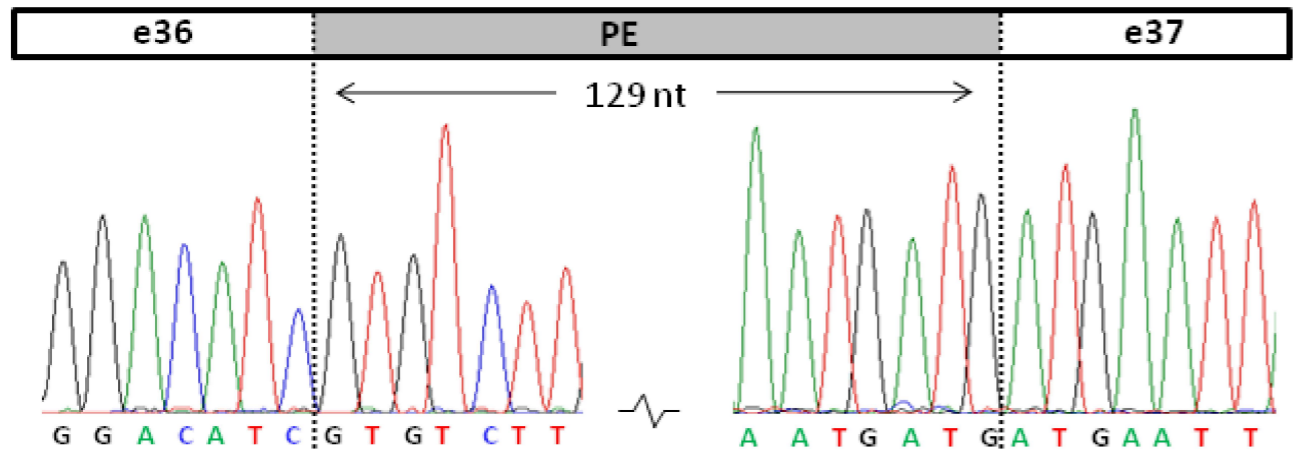

BA32\_c.5196+1056A>G

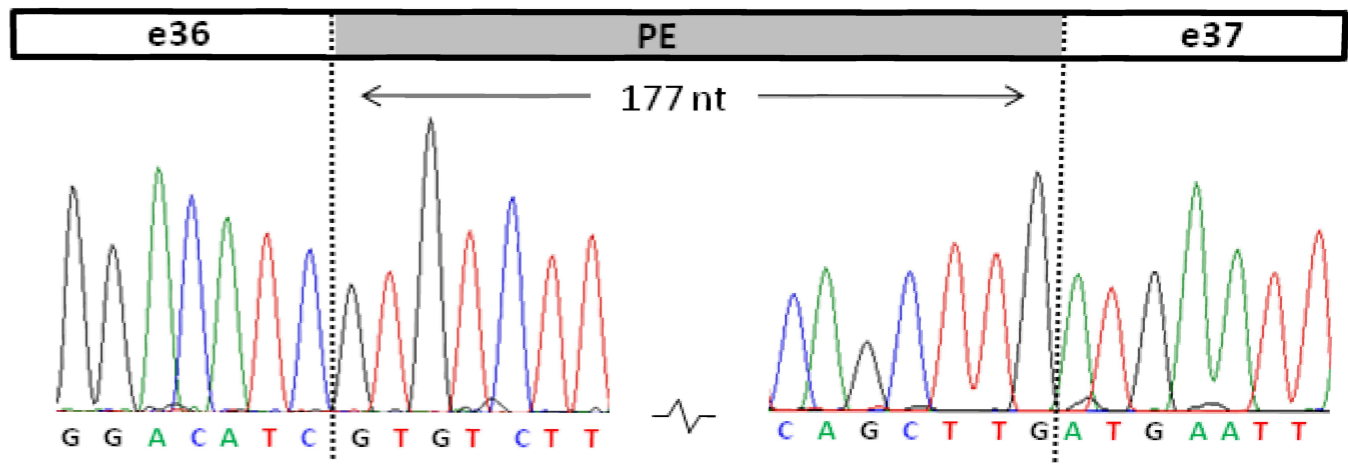

PPCs\_c.5196+1137G>A

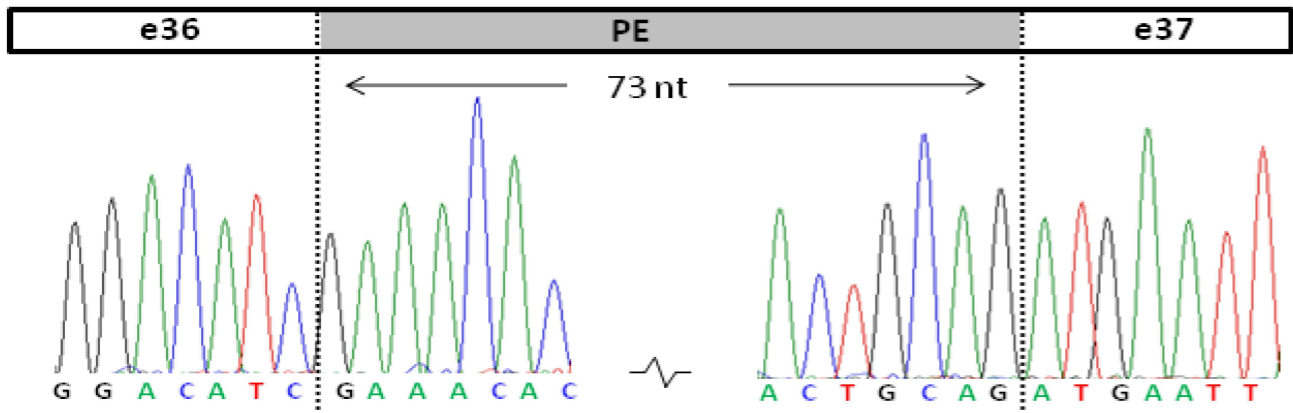

BA32\_c.5196+1216A>G

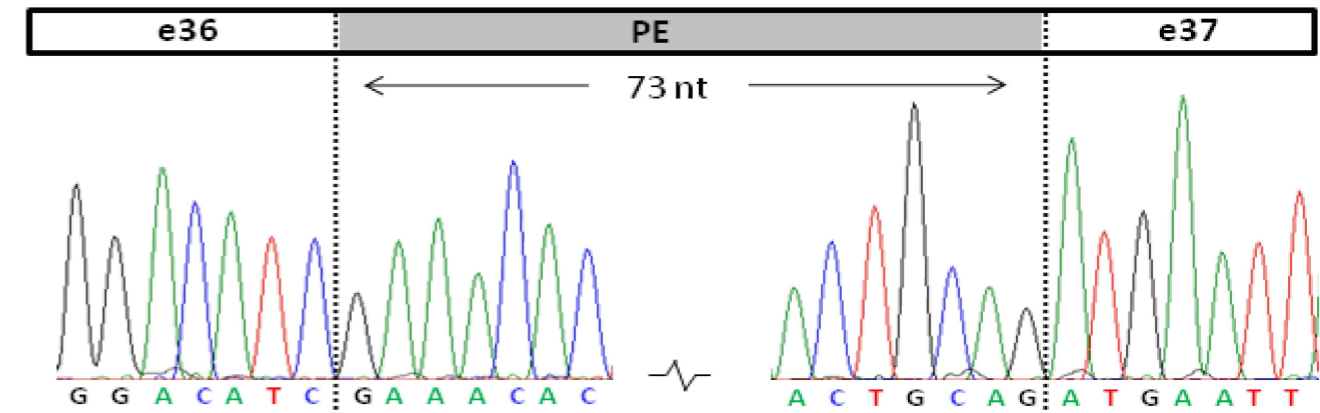

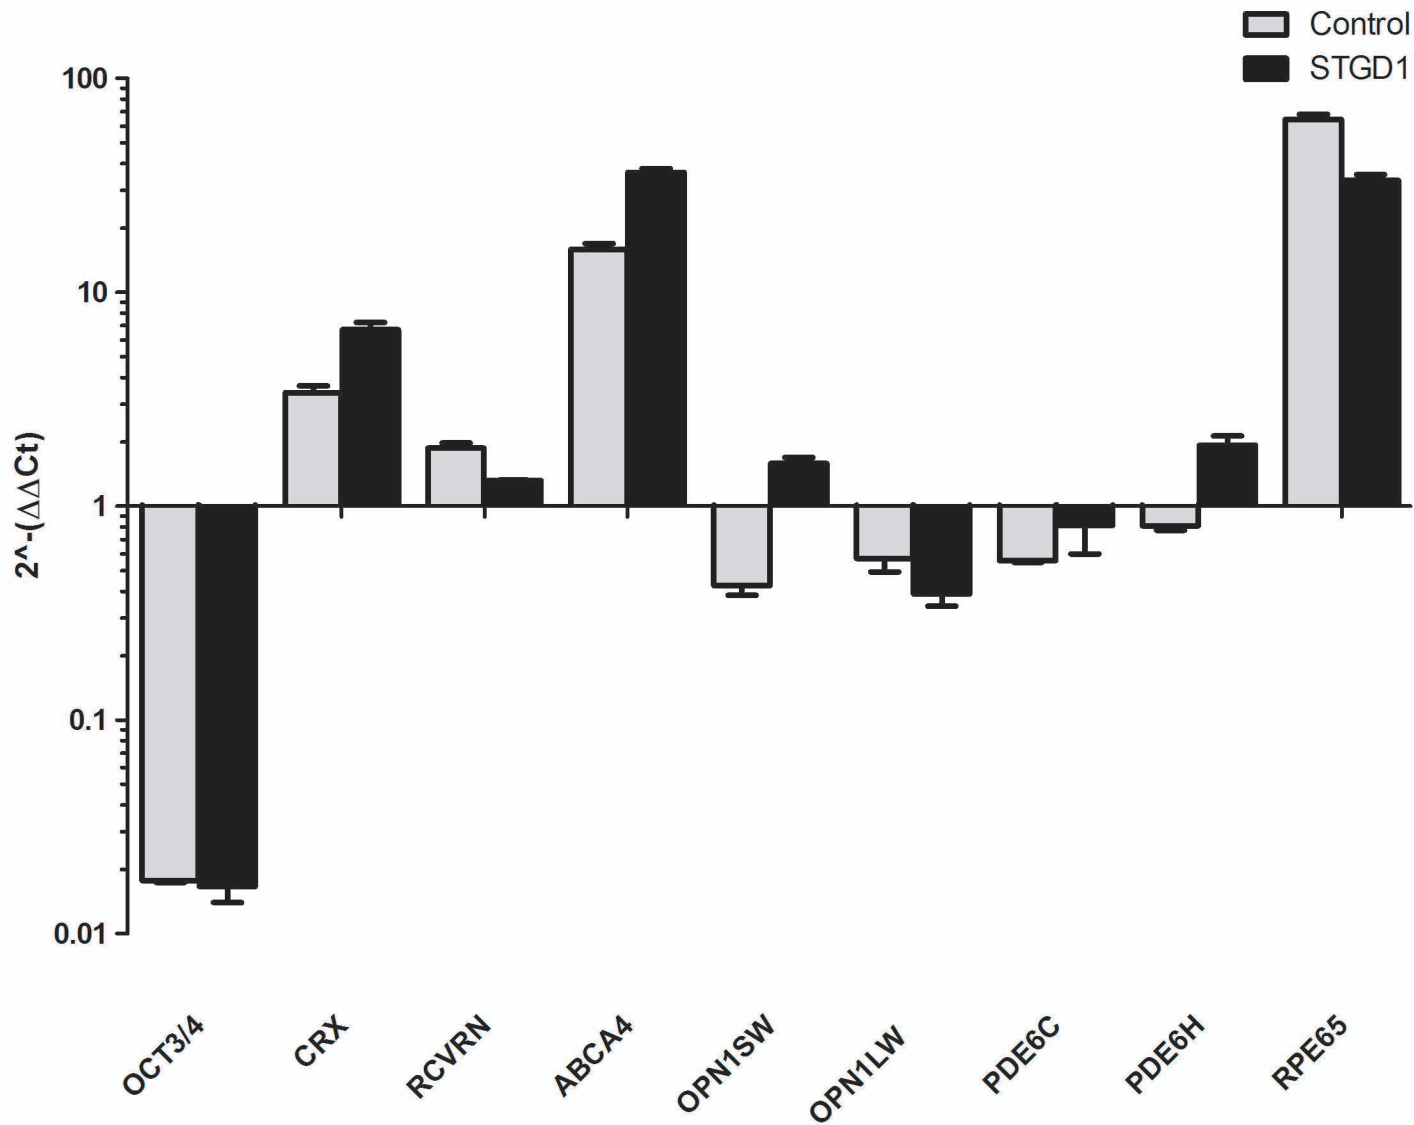

Rhodopsin L/M Opsin

Cone arrestin Recoverin

10  $\mu$ M AON6

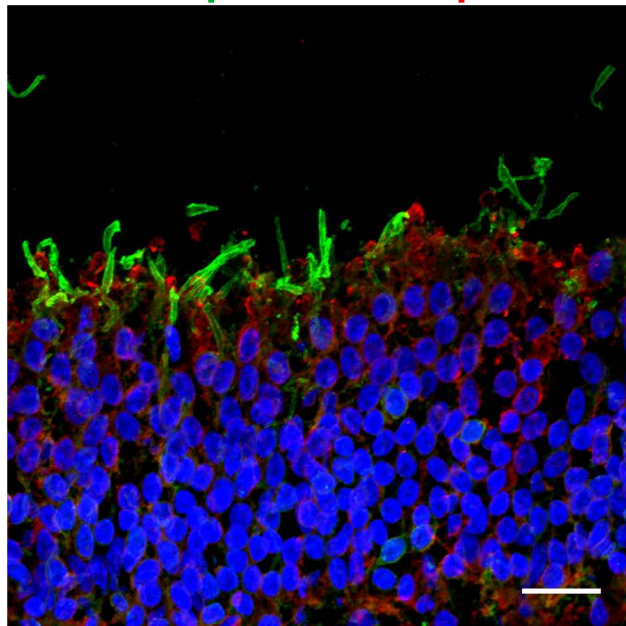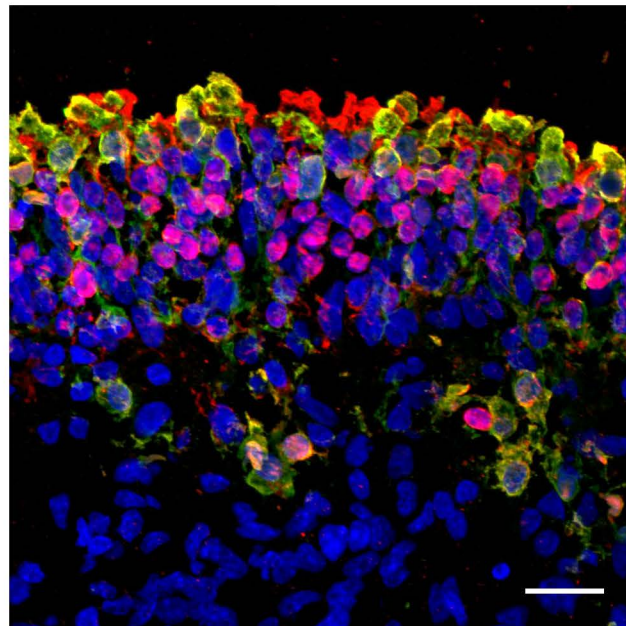

10  $\mu$ M SON

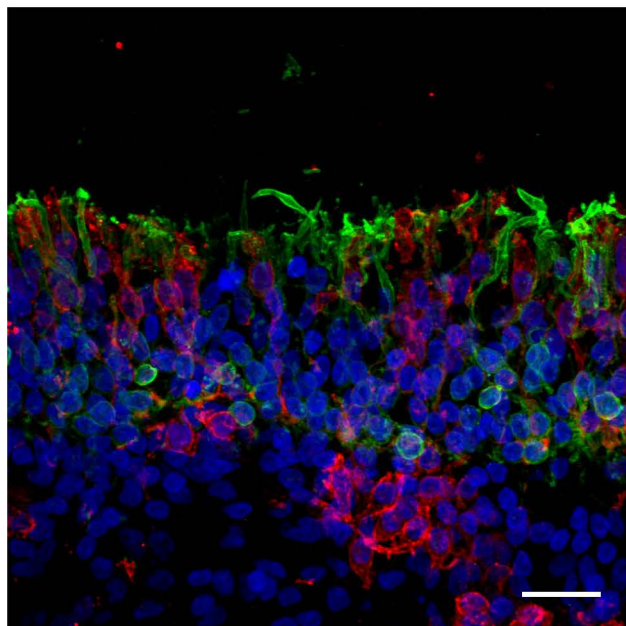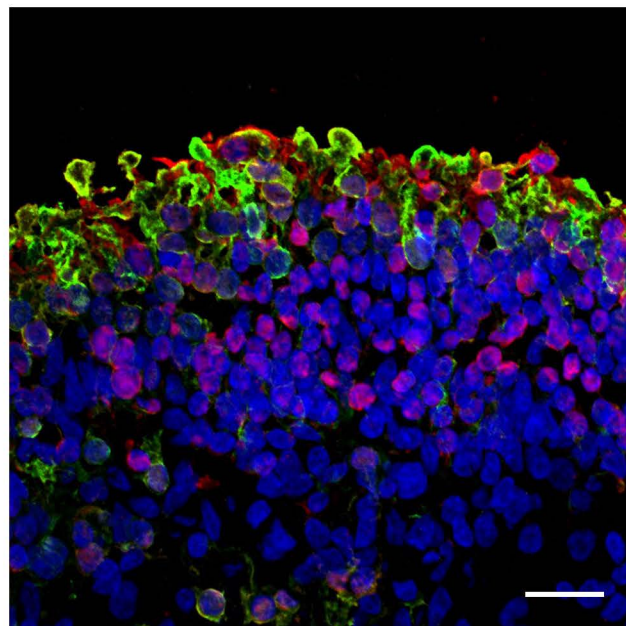



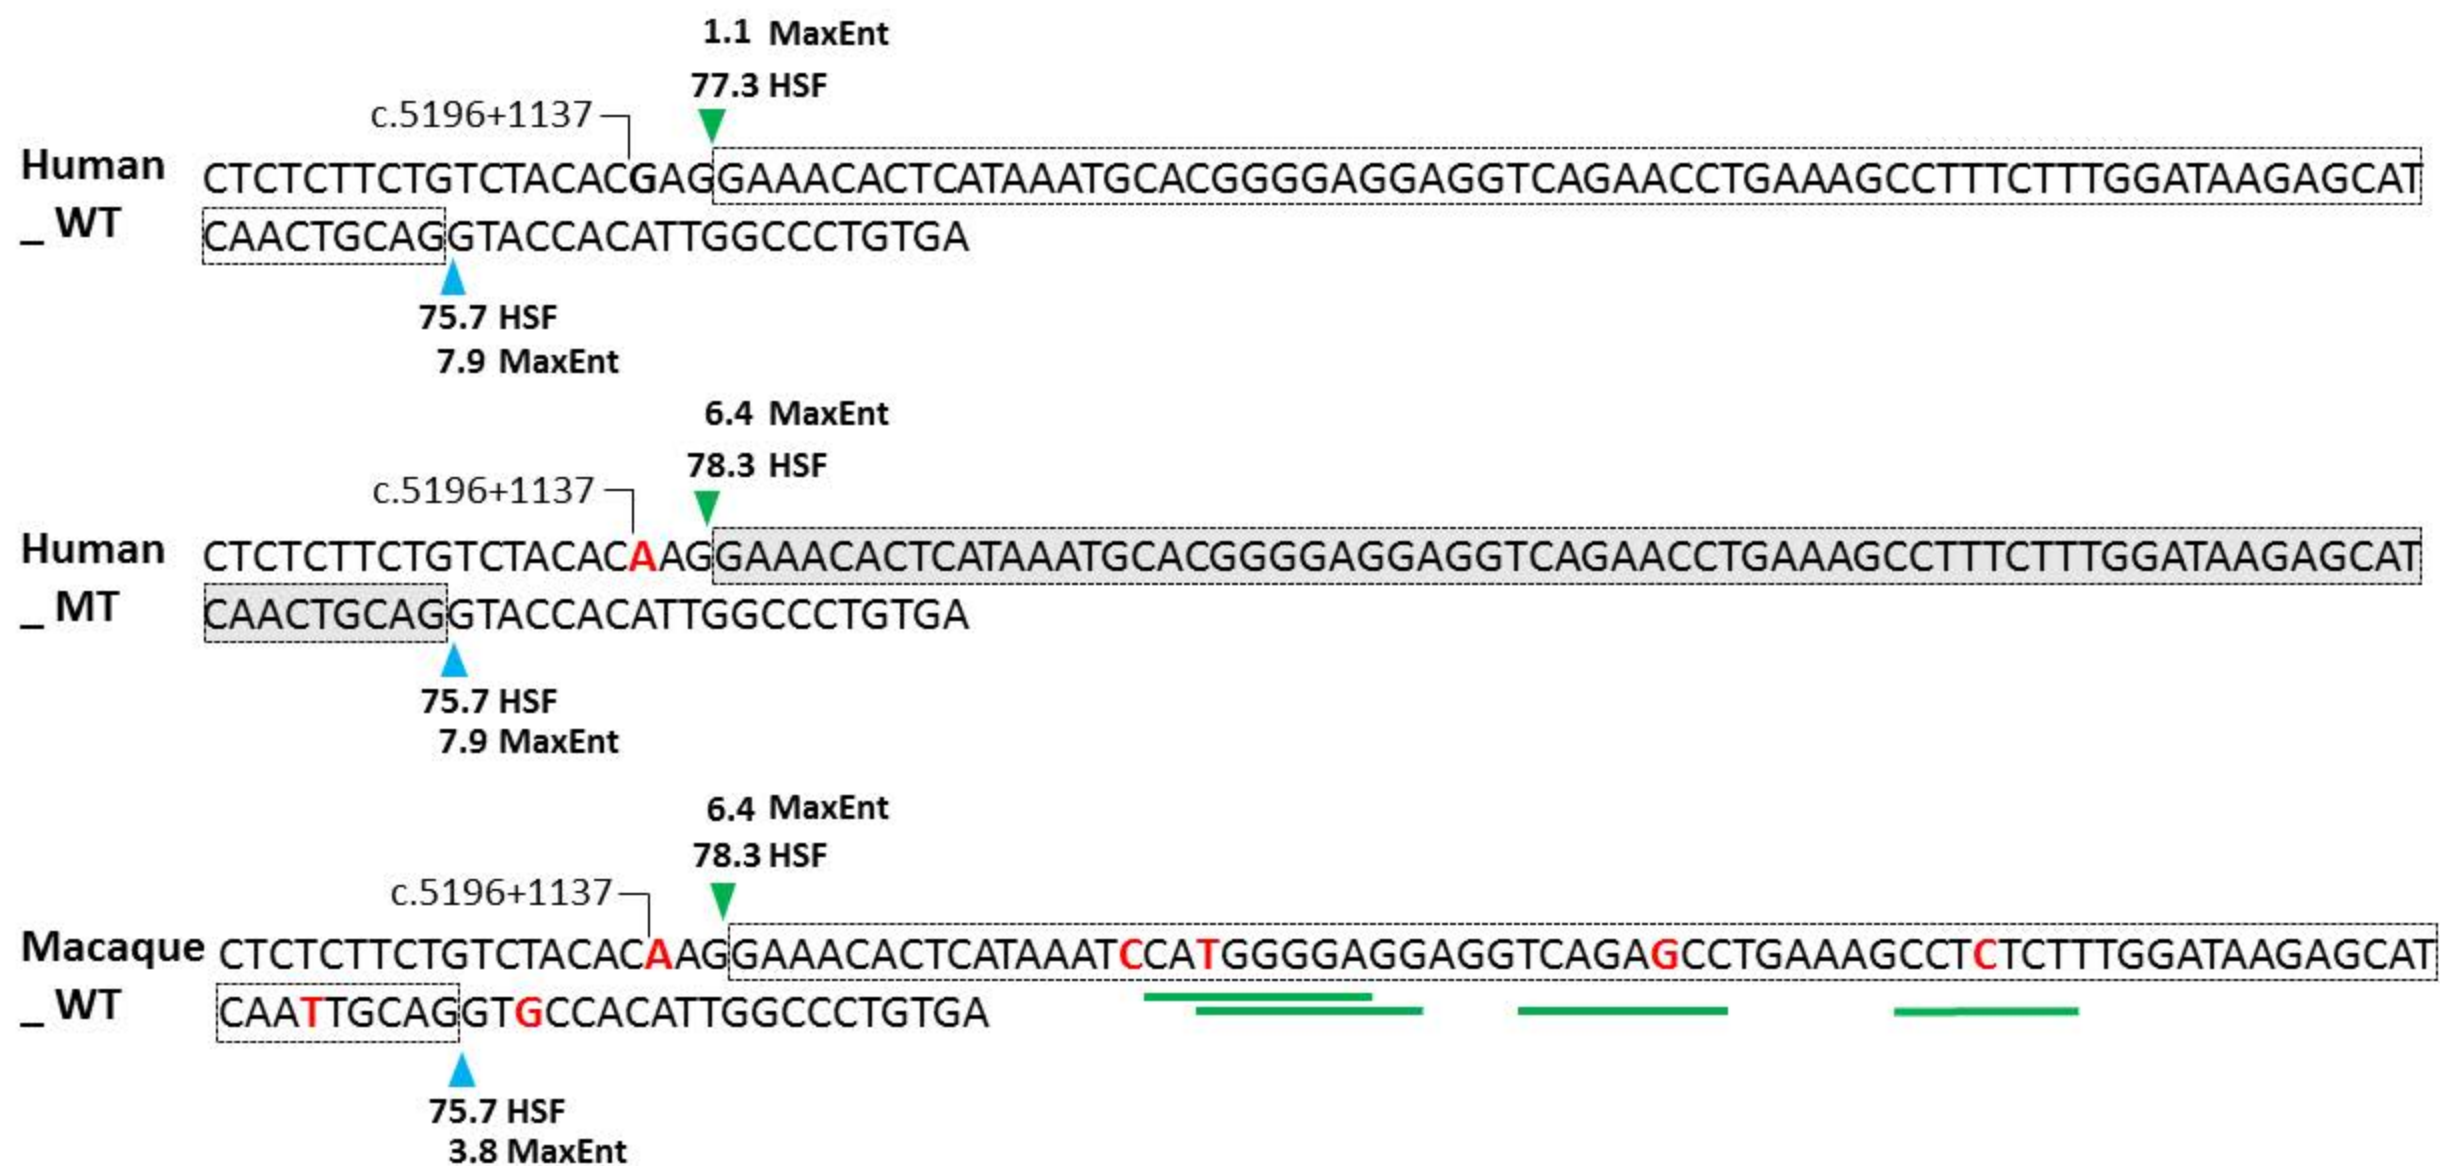

## Supplemental Figure Legends

### Supplemental Figure S1

Distribution of the ages at onset associated with different *ABCA4* alleles in *trans* with null alleles. The figure is modified from Fakin et al,<sup>7</sup> with the addition of c.5196+1137G>A. Different categories of alleles were determined based on full-field ERG. Allele p.G1961E had a specific preponderance to foveal damage, reflected by a relatively early onset of visual symptoms. Dashed line marks the 95% confidence interval of the patients harboring two null alleles.

### Supplemental Figure S2

Fundus autofluorescence images of patients harboring c.5196+1137G>A in *trans* with null alleles and age-matched patients harboring two null alleles. Patient ID and genotypes are noted in the top left corner; age is noted in the top right corner of each image.

### Supplemental Figure S3

FAF and OCT of a patient harboring two null alleles (top), a patient harboring c.5196+1137G>A in *trans* with a null allele (middle) and a patient homozygous for c.5196+1137G>A patient of similar ages. Note the increasingly milder phenotype in the presence of c.5196+1137G>A alleles.

### Supplemental Figure S4

Sanger sequencing electropherograms for four causal *ABCA4* variants in intron 36 and correct transcript are given. Sequence traces for variants tested in *in vitro* splice assays are labeled as BA32\_respective variant, whereas results obtained from photoreceptor progenitor cells (PPCs) are labelled as PPCs variants. PE, pseudoexon; nt, nucleotide.

### Supplemental Figure S5

Seven *ABCA4* variants in intron 36 were tested in wild-type (WT) construct BA32 (*ABCA4* exons 35 - exon 38). RT-PCR was performed by using exonic (ex) primers in exon 36 and 37 of *ABCA4* for WT and all the variants. Rhodopsin (*RHO*) exon 5 amplification was used as a transfection and loading control.

### Supplemental Figure S6

Gene expression profile of photoreceptor precursor cells (PPCs) derived from control (grey bars) and c.5196+1137G>A STGD1 (black bars) iPSCs. Expression levels were assessed by qPCR, normalized to GUSB expression and compared to the expression profile of day 0 iPSCs (undifferentiated). Pluripotency marker expression (*OCT3/4*) was reduced, while the expression of the photoreceptor precursor marker (*CRX*) was increased. The differentiation into RPE-like cells is shown by the increased expression of *RPE65*, while PPCs (especially STGD1 cells) showed some expression of early (*RCVRN*, *OPN1SW*) and late (*OPN1LW*, *PDE6C* or *PDE6H*). The expression of *ABCA4* was highly increased in all cell lines. The results are shown as the mean  $\pm$  SD of two experimental replicates with three technical replicates each.

### **Supplemental Figure S7**

Immunocytochemistry of retinal organoids treated with either AON or SON. Sections were stained with antibodies for rhodopsin (green, left panels), L/M opsin (red, left panels), cone arrestin (green, right panels) and recoverin (red, right panels). Nuclei were stained with DAPI in blue. Scale bar: 20  $\mu$ M.

### **Supplemental Figure S8**

Splice-site predictions are given for human wild type (WT) and mutant (MT) sequence as well as for the macaque WT. Strength of the WT and MT splice acceptor site (SAS) and splice donor site (SDS) were calculated using Human splicing Finder (HSF) and MaxEnt splicing prediction tools, by taking 20 nt upstream and downstream of the 73-nt pseudo-exon (PE). The PE found in the human mutant sequence is highlighted in grey. Nucleotides that are different among human WT/MT and macaque WT are shown in red. Green bars indicate the newly created splicing silencer elements due to the difference in human and macaque sequences. Green and blue rectangles indicate the SAS and SDS respectively.
